# Supplementary material
Source: MDPI journal article supplement (https://www.mdpi.com/2673-995X/2/4/48)
Supplement: s1 [file s1]

Supplementary Material S1 Search terms used in Ebscohost

| Search Terms                                                                                                                                                                                                                                                                                                                             | Databases                                                                                                                                                      | Limiter                                                                                                           |
|------------------------------------------------------------------------------------------------------------------------------------------------------------------------------------------------------------------------------------------------------------------------------------------------------------------------------------------|----------------------------------------------------------------------------------------------------------------------------------------------------------------|-------------------------------------------------------------------------------------------------------------------|
| trauma OR traumatic event OR<br>exposure OR experience OR<br>violence OR war trauma OR<br>torture<br><b>AND</b><br>resilience OR resiliency OR<br>resilient OR mechanism OR<br>strength OR coping OR<br>hardiness OR adaptation."<br><b>AND</b><br>adolescent OR youth OR teen<br>OR teenagers<br><b>AND</b><br>refugee OR asylum-seeker | Ebscohost(Academic Search<br>Complete, CINAHL Plus<br>with Full Text, SoINDEX,<br>Health Source:<br>Nursing/Academic Edition,<br>Medline and Psyc<br>ARTICLES) | Academic Journals<br>Peer-reviewed<br>January 1, 2010, and January 20,<br>2022.<br>English Language<br>Adolescent |
